# Supplementary material
Source: PubMed Central journal article supplement (PMC2756190)
Supplement: NIHMS127222-supplement-1.pdf [file NIHMS127222-supplement-1.pdf]

# Hypoxic Preconditioning Enhances the Benefit of Cardiac Progenitor-Cell Therapy for Treatment of Myocardial Infarction by Inducing CXCR4 Expression

Yao Liang Tang, MD, PhD<sup>\*</sup>, Wuqiang Zhu, MD, PhD<sup>†</sup>, Min Cheng, MD<sup>†</sup>, Lijuan Chen, MD<sup>\*</sup>, John Zhang, MS<sup>\*</sup>, Tao Sun, MD<sup>\*</sup>, Raj Kishore, PhD<sup>†</sup>, M. Ian Phillips, PhD Ds.c<sup>\*</sup>, Douglas W. Losordo, MD<sup>†</sup>, Gangjian Qin, MD<sup>†‡</sup>

<sup>\*</sup>Stem Cell Biology, Keck Graduate Institute, Claremont, CA, 91711, USA

<sup>†</sup>Feinberg Cardiovascular Research Institute, Northwestern University, Chicago, IL, 60611, USA

## Supplemental Material

### Supplemental Figures

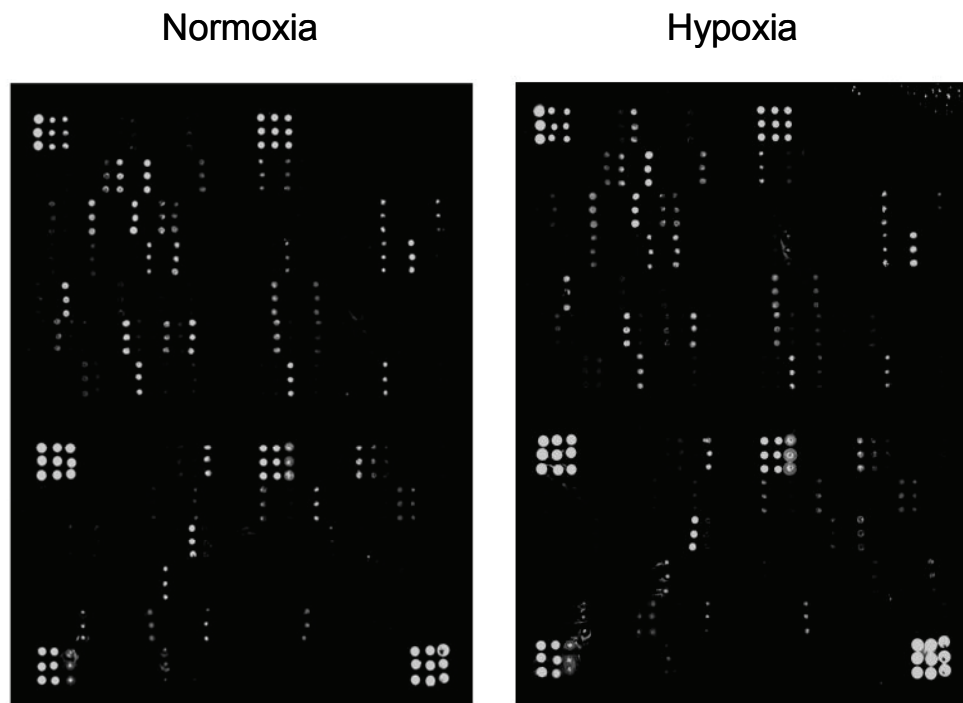

**Online Figure I: Protein-array assessments of paracrine-factor secretion.** CLK cells (passages 7-8) were cultured to 90% confluency in standard media, then transferred to a standard incubator or hypoxia chamber (0.1% O<sub>2</sub>) and cultured in DMEM containing 0.2% FBS. Twelve hours later, the media were collected, concentrated by using the Millipore

Amicon Centricon YM-3 system (Bedford, MA), and protein array assays (L Series 308, Ray Biotech, Inc) were performed as directed by manufacturer's instructions. After developing, the membranes were scanned, and the images were processed with the analysis-tool software (Ray Biotech, Inc). The mean signal intensity for each cytokine was obtained from triplicate measurements in each chip and normalized to the internal controls, then the ratio of cytokine levels in hypoxia-preconditioned and normoxia-cultured cells was calculated. Representative images of arrays performed with the media from normoxia-cultured (left) and hypoxia-preconditioned (right) cells are displayed here, and the paracrine factors analyzed are provided in Online Table I.

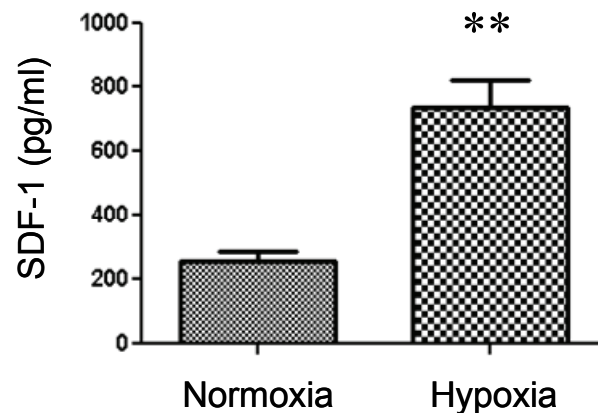

**Online Figure II: Hypoxic preconditioning increases SDF-1 secretion from CLK cells.**

CLK cells (passages 7-8) were cultured to 90% confluency in standard media, then transferred to a standard incubator or hypoxia chamber (0.1% O<sub>2</sub>) and cultured in DMEM containing 0.2% FBS. Six hours later, the media were collected, and SDF-1 concentrations were measured with high-sensitivity mouse CXCL12/SDF-1 ELISA kits (Quantikine, R&D Systems, Minneapolis, MN) as directed by the manufacturer's instructions. Values are presented as mean±SEM of 4 experiments (\*\*p=0.0015, Student's t-test).

## Supplemental Table

**Online Table I:** Paracrine-factor secretion from hypoxia-preconditioned and normoxia-cultured CLK cells.

|                        | Hypoxia-CLK | Normoxia-CLK | Ratio       |
|------------------------|-------------|--------------|-------------|
| Activin A              | 3,990.00    | 1,000.68     | <b>3.99</b> |
| TIMP-1                 | 1,535.33    | 396.96       | <b>3.87</b> |
| TNF RI / TNFRSF1A      | 1,126.33    | 370.22       | <b>3.04</b> |
| Progranulin            | 1,944.33    | 671.41       | <b>2.90</b> |
| TGF-beta RII           | 1,006.00    | 366.16       | <b>2.75</b> |
| VEGF                   | 687.00      | 299.15       | <b>2.30</b> |
| PF-4                   | 1,010.67    | 509.31       | <b>1.98</b> |
| TCA-3                  | 575.67      | 318.78       | <b>1.81</b> |
| TMEFF1 / Tomoregulin-1 | 649.33      | 376.99       | <b>1.72</b> |
| 6Ckine                 | 1,146.67    | 672.76       | <b>1.70</b> |
| TGF-beta RI / ALK-5    | 542.33      | 324.54       | <b>1.67</b> |
| Lefty-1                | 614.33      | 379.02       | <b>1.62</b> |
| PDGF R beta            | 519.33      | 322.84       | <b>1.61</b> |
| VCAM-1                 | 516.00      | 327.58       | <b>1.58</b> |
| Epigen                 | 2,200.00    | 1,425.38     | <b>1.54</b> |
| Osteopontin            | 17,689.00   | 11,466.36    | <b>1.54</b> |
| WISP-1 / CCN4          | 539.67      | 351.61       | <b>1.53</b> |
| IL-3 R beta            | 1,093.00    | 716.08       | <b>1.53</b> |
| RAGE                   | 468.67      | 308.63       | <b>1.52</b> |
| Frizzled-7             | 506.67      | 335.03       | <b>1.51</b> |
| AgRP                   | 1,001.00    | 662.61       | <b>1.51</b> |
| OX40 Ligand / TNFSF4   | 530.33      | 352.62       | <b>1.50</b> |
| TGF-beta 2             | 639.67      | 428.43       | <b>1.49</b> |
| P-Selectin             | 499.33      | 336.04       | <b>1.49</b> |
| Resistin               | 491.67      | 332.66       | <b>1.48</b> |
| PDGF R alpha           | 504.67      | 342.81       | <b>1.47</b> |
| FGF-21                 | 505.00      | 345.86       | <b>1.46</b> |
| TECK                   | 539.33      | 369.54       | <b>1.46</b> |
| PIGF-2                 | 564.00      | 387.48       | <b>1.46</b> |
| CXCR4                  | 589.00      | 405.42       | <b>1.45</b> |
| DAN                    | 510.67      | 352.29       | <b>1.45</b> |
| RANTES                 | 507.00      | 349.92       | <b>1.45</b> |
| TNF-alpha              | 563.67      | 390.19       | <b>1.44</b> |
| TFPI                   | 514.67      | 357.02       | <b>1.44</b> |
| RELM beta              | 458.67      | 319.12       | <b>1.44</b> |
| TRAIL R2 / TNFRSF10B   | 477.67      | 334.35       | <b>1.43</b> |
| Pentraxin3 / TSG-14    | 518.67      | 363.45       | <b>1.43</b> |
| b FGF                  | 459.00      | 321.83       | <b>1.43</b> |
| IL-17BR                | 995.67      | 698.14       | <b>1.43</b> |
| Granzyme G             | 489.67      | 346.87       | <b>1.41</b> |
| Chordin-Like 2         | 483.33      | 343.15       | <b>1.41</b> |
| TNF-beta / TNFSF1B     | 547.33      | 390.53       | <b>1.40</b> |

|                                        |          |        |      |
|----------------------------------------|----------|--------|------|
| HGF R                                  | 634.67   | 453.13 | 1.40 |
| CXCR6                                  | 540.33   | 386.13 | 1.40 |
| TRANCE / TNFSF11                       | 475.33   | 340.10 | 1.40 |
| EDAR                                   | 476.00   | 341.12 | 1.40 |
| WIF-1                                  | 510.00   | 365.82 | 1.39 |
| TWEAK / TNFSF12                        | 467.00   | 335.03 | 1.39 |
| VE-Cadherin                            | 438.67   | 315.74 | 1.39 |
| IL-3                                   | 690.33   | 497.12 | 1.39 |
| IL-2 R beta                            | 662.33   | 477.50 | 1.39 |
| VEGF R1                                | 554.00   | 401.02 | 1.38 |
| TL1A / TNFSF15                         | 523.00   | 378.68 | 1.38 |
| VEGF R2                                | 536.00   | 388.16 | 1.38 |
| Csk                                    | 497.33   | 362.44 | 1.37 |
| Soggy-1                                | 533.67   | 389.85 | 1.37 |
| AR (Amphiregulin)                      | 503.67   | 370.56 | 1.36 |
| TLR1                                   | 497.67   | 366.16 | 1.36 |
| Kremen-1                               | 483.33   | 356.01 | 1.36 |
| Leptin R                               | 546.67   | 402.71 | 1.36 |
| IL-24                                  | 520.33   | 383.42 | 1.36 |
| Dkk-3                                  | 502.67   | 371.57 | 1.35 |
| TARC                                   | 463.67   | 343.15 | 1.35 |
| MFG-E8                                 | 694.33   | 515.40 | 1.35 |
| TWEAK R / TNFRSF12                     | 430.67   | 319.80 | 1.35 |
| Cerberus 1                             | 484.33   | 359.73 | 1.35 |
| Dkk-4                                  | 597.67   | 444.67 | 1.34 |
| PDGF C                                 | 461.00   | 343.49 | 1.34 |
| DPPIV / CD26                           | 485.00   | 361.42 | 1.34 |
| IL-1 R9                                | 494.00   | 368.53 | 1.34 |
| Frizzled-1                             | 480.33   | 358.38 | 1.34 |
| IL-1 RII                               | 1,105.33 | 826.06 | 1.34 |
| Tie-2                                  | 478.33   | 357.70 | 1.34 |
| Activin RIB / ALK-4                    | 692.33   | 518.11 | 1.34 |
| DKK-1                                  | 572.67   | 429.10 | 1.33 |
| HVEM / TNFRSF14                        | 600.00   | 449.75 | 1.33 |
| TSLP R                                 | 469.67   | 352.96 | 1.33 |
| Prolactin                              | 524.33   | 394.25 | 1.33 |
| EGF R                                  | 518.67   | 390.19 | 1.33 |
| Fractalkine                            | 568.67   | 428.43 | 1.33 |
| TCCR / WSX-1                           | 509.00   | 384.77 | 1.32 |
| Angiopoietin-like 3                    | 581.00   | 441.29 | 1.32 |
| FGF R3                                 | 467.33   | 355.33 | 1.32 |
| MAdCAM-1                               | 506.33   | 385.11 | 1.31 |
| IL-10 R alpha                          | 447.67   | 340.78 | 1.31 |
| MMP-3                                  | 497.00   | 378.68 | 1.31 |
| TIMP-4                                 | 506.00   | 386.46 | 1.31 |
| IL-3 R alpha                           | 496.33   | 379.36 | 1.31 |
| CD40 Ligand / TNFSF5                   | 511.00   | 390.86 | 1.31 |
| BAFF R / TNFRSF13C                     | 530.67   | 406.09 | 1.31 |
| uPAR                                   | 521.33   | 399.32 | 1.31 |
| Kremen-2                               | 532.33   | 408.12 | 1.30 |
| TIMP-2                                 | 505.67   | 387.82 | 1.30 |
| Coagulation Factor III / Tissue Factor | 616.67   | 474.45 | 1.30 |

|                               |           |           |             |
|-------------------------------|-----------|-----------|-------------|
| <b>S100A10</b>                | 438.00    | 337.06    | <b>1.30</b> |
| <b>IL-6 R</b>                 | 494.67    | 381.05    | <b>1.30</b> |
| <b>Integrin beta 2 / CD18</b> | 438.67    | 338.41    | <b>1.30</b> |
| <b>Erythropoietin (EPO)</b>   | 523.00    | 404.06    | <b>1.29</b> |
| <b>IFN-alpha / beta R2</b>    | 480.33    | 371.91    | <b>1.29</b> |
| <b>Growth Hormone R</b>       | 498.67    | 386.13    | <b>1.29</b> |
| <b>IL-20 R alpha</b>          | 527.33    | 408.46    | <b>1.29</b> |
| <b>TAC1 / TNFRSF13B</b>       | 477.67    | 370.22    | <b>1.29</b> |
| <b>Urokinase</b>              | 454.33    | 352.29    | <b>1.29</b> |
| <b>IL-18 R alpha/IL-1 R5</b>  | 452.33    | 351.27    | <b>1.29</b> |
| <b>IL-13 R alpha 2</b>        | 546.67    | 425.04    | <b>1.29</b> |
| <b>IL-4</b>                   | 460.33    | 358.04    | <b>1.29</b> |
| <b>IL-12 R beta 1</b>         | 508.00    | 395.60    | <b>1.28</b> |
| <b>Artemin</b>                | 562.67    | 438.24    | <b>1.28</b> |
| <b>Lymphotactin</b>           | 526.33    | 410.15    | <b>1.28</b> |
| <b>CD40</b>                   | 578.67    | 451.10    | <b>1.28</b> |
| <b>MIP-3 alpha</b>            | 579.00    | 451.44    | <b>1.28</b> |
| <b>CCR7</b>                   | 448.33    | 350.59    | <b>1.28</b> |
| <b>IL-31 RA</b>               | 519.00    | 406.43    | <b>1.28</b> |
| <b>TGF-beta 3</b>             | 427.00    | 335.03    | <b>1.27</b> |
| <b>CD14</b>                   | 494.33    | 388.16    | <b>1.27</b> |
| <b>FLRG (Follistatin)</b>     | 468.00    | 367.51    | <b>1.27</b> |
| <b>IL-17E</b>                 | 637.00    | 500.51    | <b>1.27</b> |
| <b>CD27 Ligand / TNFSF7</b>   | 512.67    | 403.72    | <b>1.27</b> |
| <b>B7-1/CD80</b>              | 467.33    | 368.19    | <b>1.27</b> |
| <b>SIGIRR</b>                 | 470.00    | 370.56    | <b>1.27</b> |
| <b>G-CSF</b>                  | 542.33    | 428.43    | <b>1.27</b> |
| <b>MMP-2</b>                  | 509.00    | 402.71    | <b>1.26</b> |
| <b>CCL7 / MCP-3 / MARC</b>    | 21,480.00 | 17,009.86 | <b>1.26</b> |
| <b>AxI</b>                    | 605.00    | 479.19    | <b>1.26</b> |
| <b>IL-21 R</b>                | 471.33    | 373.94    | <b>1.26</b> |
| <b>TSLP</b>                   | 522.00    | 414.55    | <b>1.26</b> |
| <b>Fit-3 Ligand</b>           | 666.67    | 529.61    | <b>1.26</b> |
| <b>Glut2</b>                  | 928.33    | 737.73    | <b>1.26</b> |
| <b>GM-CSF</b>                 | 626.67    | 499.49    | <b>1.25</b> |
| <b>IFN-beta</b>               | 462.00    | 369.54    | <b>1.25</b> |
| <b>SCF</b>                    | 529.67    | 423.69    | <b>1.25</b> |
| <b>IL-7 R alpha</b>           | 468.00    | 374.62    | <b>1.25</b> |
| <b>TGF-beta 1</b>             | 617.00    | 494.08    | <b>1.25</b> |
| <b>IL-22</b>                  | 808.67    | 647.72    | <b>1.25</b> |
| <b>IL-15</b>                  | 768.67    | 615.91    | <b>1.25</b> |
| <b>Osteoactivin / GPNMB</b>   | 589.67    | 472.76    | <b>1.25</b> |
| <b>ALCAM</b>                  | 502.67    | 403.05    | <b>1.25</b> |
| <b>TREM-1</b>                 | 454.00    | 364.13    | <b>1.25</b> |
| <b>TLR4</b>                   | 553.67    | 444.67    | <b>1.25</b> |
| <b>FGF R4</b>                 | 965.67    | 776.65    | <b>1.24</b> |
| <b>GDF-5</b>                  | 542.67    | 437.23    | <b>1.24</b> |
| <b>Neuregulin-3 / NRG3</b>    | 460.67    | 371.24    | <b>1.24</b> |
| <b>MCP-5</b>                  | 549.00    | 442.64    | <b>1.24</b> |
| <b>IGFBP-6</b>                | 562.67    | 454.15    | <b>1.24</b> |
| <b>IL-17C</b>                 | 492.67    | 397.97    | <b>1.24</b> |
| <b>DR3 / TNFRSF25</b>         | 756.00    | 612.18    | <b>1.23</b> |

|                              |          |          |      |
|------------------------------|----------|----------|------|
| ICAM-2 / CD102               | 718.67   | 582.40   | 1.23 |
| IL-20                        | 773.00   | 627.41   | 1.23 |
| ICAM-5                       | 459.67   | 373.27   | 1.23 |
| CCR10                        | 582.67   | 475.80   | 1.22 |
| MMP-24 / MT5-MMP             | 424.67   | 346.87   | 1.22 |
| CXCR2 / IL-8 RB              | 584.00   | 477.50   | 1.22 |
| EG-VEGF / PK1                | 456.00   | 372.93   | 1.22 |
| ICAM-1                       | 557.33   | 455.84   | 1.22 |
| Decorin                      | 516.67   | 423.01   | 1.22 |
| Eotaxin-2                    | 552.00   | 454.15   | 1.22 |
| SCF R / c-kit                | 461.67   | 380.71   | 1.21 |
| LIF                          | 577.33   | 476.14   | 1.21 |
| IL-17RD                      | 556.33   | 458.88   | 1.21 |
| KC                           | 592.33   | 489.34   | 1.21 |
| MMP-12                       | 452.33   | 374.28   | 1.21 |
| IGFBP-5                      | 579.00   | 479.19   | 1.21 |
| VEGFC                        | 430.00   | 356.01   | 1.21 |
| BTC (Betacellulin)           | 444.67   | 369.21   | 1.20 |
| CD30 L                       | 619.67   | 515.40   | 1.20 |
| IL-21                        | 518.00   | 431.47   | 1.20 |
| Fas Ligand                   | 626.00   | 521.49   | 1.20 |
| Adiponectin / Acrp30         | 623.00   | 519.80   | 1.20 |
| CTLA-4 / CD152               | 804.67   | 675.81   | 1.19 |
| FAM3B                        | 599.67   | 503.89   | 1.19 |
| Insulin                      | 618.33   | 520.48   | 1.19 |
| Spinesin Ectodomain          | 454.67   | 383.42   | 1.19 |
| CCL8 / MCP-2                 | 555.33   | 468.36   | 1.19 |
| GITR Ligand / TNFSF18        | 597.33   | 503.89   | 1.19 |
| TLR3                         | 484.67   | 409.14   | 1.18 |
| IGF-II                       | 542.67   | 458.55   | 1.18 |
| Activin C                    | 616.67   | 521.15   | 1.18 |
| Cripto                       | 595.33   | 503.22   | 1.18 |
| IL-2                         | 523.33   | 442.98   | 1.18 |
| ICK                          | 488.00   | 414.21   | 1.18 |
| IL-9 R                       | 1,235.33 | 1,048.73 | 1.18 |
| IL-12 p40/p70                | 580.33   | 492.73   | 1.18 |
| Thrombospondin               | 531.67   | 451.44   | 1.18 |
| Ubiquitin                    | 636.33   | 540.44   | 1.18 |
| GFR alpha-3 / GDNF R alpha-3 | 577.67   | 491.03   | 1.18 |
| Endoglin / CD105             | 579.00   | 492.73   | 1.18 |
| Frizzled-6                   | 2,089.00 | 1,778.35 | 1.17 |
| CD30                         | 525.33   | 447.72   | 1.17 |
| Epiregulin                   | 590.67   | 503.55   | 1.17 |
| Cardiotrophin-1              | 563.00   | 480.20   | 1.17 |
| MDC                          | 558.67   | 478.17   | 1.17 |
| Neurturin                    | 482.33   | 413.20   | 1.17 |
| MIG                          | 479.00   | 410.83   | 1.17 |
| VEGF R3                      | 496.67   | 426.40   | 1.16 |
| TPO                          | 565.00   | 485.28   | 1.16 |
| CD27 / TNFRSF7               | 500.33   | 430.12   | 1.16 |
| LEPTIN(OB)                   | 521.33   | 449.07   | 1.16 |
| LIGHT / TNFSF14              | 481.00   | 415.23   | 1.16 |

|                              |           |           |      |
|------------------------------|-----------|-----------|------|
| IL-17D                       | 525.67    | 454.49    | 1.16 |
| NOV / CCN3                   | 483.33    | 417.94    | 1.16 |
| CXCR3                        | 665.67    | 576.65    | 1.15 |
| IL-15 R alpha                | 746.00    | 650.42    | 1.15 |
| SDF-1                        | 461.00    | 403.05    | 1.14 |
| IFN-gamma                    | 514.67    | 450.09    | 1.14 |
| GFR alpha-2 / GDNF R alpha-2 | 573.00    | 503.22    | 1.14 |
| Cryptic                      | 547.33    | 481.90    | 1.14 |
| NGF R / TNFRSF16             | 547.33    | 481.90    | 1.14 |
| IL-10                        | 660.33    | 585.79    | 1.13 |
| I-TAC                        | 654.67    | 581.73    | 1.13 |
| IL-13                        | 915.67    | 817.26    | 1.12 |
| Shh-N                        | 539.67    | 483.93    | 1.12 |
| L-Selectin                   | 645.00    | 580.37    | 1.11 |
| IL-17F                       | 455.00    | 412.18    | 1.10 |
| IL-17RC                      | 587.67    | 533.67    | 1.10 |
| Thymus Chemokine-1           | 734.00    | 669.71    | 1.10 |
| beta-Catenin                 | 532.33    | 485.96    | 1.10 |
| Galectin-3                   | 8,177.67  | 7,519.14  | 1.09 |
| MMP-9                        | 606.00    | 560.41    | 1.08 |
| MIP-1 alpha                  | 591.67    | 548.90    | 1.08 |
| Follistatin-like 1           | 557.67    | 517.77    | 1.08 |
| FCrRIIB / CD32b              | 752.00    | 700.17    | 1.07 |
| CRP                          | 581.00    | 542.81    | 1.07 |
| E-Selectin                   | 770.00    | 719.46    | 1.07 |
| Angiopoietin-like 2          | 568.67    | 531.98    | 1.07 |
| Serum Amyloid A1             | 503.00    | 470.73    | 1.07 |
| MFRP                         | 528.33    | 494.76    | 1.07 |
| IL-1 R6 / IL-1 R rp2         | 778.00    | 736.38    | 1.06 |
| IL-23                        | 795.33    | 754.32    | 1.05 |
| GITR                         | 513.67    | 487.65    | 1.05 |
| Dtk                          | 2,533.00  | 2,413.54  | 1.05 |
| IL-31                        | 910.67    | 868.36    | 1.05 |
| IL-17                        | 557.00    | 532.66    | 1.05 |
| IL-5                         | 578.33    | 553.30    | 1.05 |
| BCMA / TNFRSF17              | 694.33    | 664.98    | 1.04 |
| Osteoporotegerin             | 994.00    | 959.39    | 1.04 |
| LRP-6                        | 534.00    | 516.75    | 1.03 |
| MIP-3 beta                   | 563.67    | 546.87    | 1.03 |
| Gremlin                      | 3,213.00  | 3,170.91  | 1.01 |
| GDF-1                        | 628.00    | 619.97    | 1.01 |
| VEGF-D                       | 474.33    | 468.36    | 1.01 |
| CXCL16                       | 2,215.33  | 2,188.16  | 1.01 |
| CCR6                         | 1,940.00  | 1,922.51  | 1.01 |
| IGFBP-2                      | 821.00    | 814.55    | 1.01 |
| TROY                         | 2,072.00  | 2,058.89  | 1.01 |
| IL-22BP                      | 1,177.00  | 1,170.22  | 1.01 |
| MCP-1                        | 837.67    | 839.93    | 1.00 |
| IFN-alpha / beta R1          | 622.33    | 624.03    | 1.00 |
| Internal control             | 48,289.33 | 48,825.85 | 0.99 |
| CTACK                        | 15,464.00 | 15,800.38 | 0.98 |
| IL-5 R alpha                 | 553.33    | 567.18    | 0.98 |

|                                   |          |          |      |
|-----------------------------------|----------|----------|------|
| FADD                              | 2,786.67 | 2,870.74 | 0.97 |
| IFN-gamma R1                      | 573.67   | 593.23   | 0.97 |
| CCL4 / MIP-1 beta                 | 551.67   | 571.58   | 0.97 |
| IL-7                              | 575.33   | 596.62   | 0.96 |
| GFR alpha-4 / GDNF R alpha-4      | 1,157.33 | 1,200.68 | 0.96 |
| Granzyme D                        | 618.67   | 648.73   | 0.95 |
| GDF-9                             | 595.00   | 624.03   | 0.95 |
| MIP-1 gamma                       | 1,904.00 | 2,031.48 | 0.94 |
| Lungkine                          | 950.33   | 1,017.94 | 0.93 |
| MIP-2                             | 1,080.33 | 1,170.90 | 0.92 |
| CD11b                             | 717.33   | 779.02   | 0.92 |
| Eotaxin                           | 644.67   | 701.52   | 0.92 |
| IL-6                              | 577.67   | 642.98   | 0.90 |
| CCL1 / I-309 / TCA-3              | 2,201.33 | 2,450.43 | 0.90 |
| CCR3                              | 2,201.33 | 2,450.43 | 0.90 |
| IL-2 R alpha                      | 1,332.67 | 1,485.62 | 0.90 |
| TRAIL / TNFSF10                   | 1,028.33 | 1,147.89 | 0.90 |
| LIX                               | 847.00   | 948.56   | 0.89 |
| Lymphotoxin beta R / TNFRSF3      | 1,811.33 | 2,034.18 | 0.89 |
| MMP-14 / LEM-2                    | 762.00   | 856.18   | 0.89 |
| IL-1 RI                           | 3,182.33 | 3,602.72 | 0.88 |
| IGF-I                             | 955.33   | 1,085.62 | 0.88 |
| SLPI                              | 558.33   | 639.26   | 0.87 |
| HGF                               | 2,070.33 | 2,379.02 | 0.87 |
| Fas / TNFRSF6                     | 3,466.00 | 4,004.75 | 0.87 |
| IL-4 R                            | 618.00   | 719.12   | 0.86 |
| IGFBP-3                           | 634.00   | 738.07   | 0.86 |
| IL-28 / IFN-lambda                | 1,494.33 | 1,803.39 | 0.83 |
| TLR2                              | 1,181.33 | 1,427.75 | 0.83 |
| BLC                               | 641.67   | 784.44   | 0.82 |
| IL-1 beta                         | 848.67   | 1,047.72 | 0.81 |
| TNF RII                           | 1,809.33 | 2,247.38 | 0.81 |
| IL-27                             | 3,409.00 | 4,244.34 | 0.80 |
| Granzyme B                        | 746.67   | 930.97   | 0.80 |
| Crossveinless-2                   | 3,666.67 | 4,649.76 | 0.79 |
| Common gamma Chain / IL-2 R gamma | 1,253.67 | 1,591.88 | 0.79 |
| CRG-2                             | 634.33   | 822.34   | 0.77 |
| Endocan                           | 790.67   | 1,030.46 | 0.77 |
| FGF R5 beta                       | 978.67   | 1,299.83 | 0.75 |
| GDF-3                             | 712.33   | 952.29   | 0.75 |
| SPARC                             | 1,836.00 | 2,471.75 | 0.74 |
| IL-23 R                           | 3,980.33 | 5,377.68 | 0.74 |
| IL-12 p70                         | 629.67   | 853.81   | 0.74 |
| M-CSF                             | 1,779.33 | 2,439.60 | 0.73 |
| IL-1 R4 / ST2                     | 3,874.67 | 5,383.43 | 0.72 |
| Endostatin                        | 543.33   | 795.60   | 0.68 |
| IGFBP-rp1 / IGFBP-7               | 5,945.33 | 8,725.57 | 0.68 |
| VEGF-B                            | 948.67   | 1,401.70 | 0.68 |
| IL-17R                            | 1,771.67 | 2,625.73 | 0.67 |
| IL-16                             | 3,540.00 | 5,278.19 | 0.67 |
| IL-9                              | 1,148.33 | 1,738.08 | 0.66 |
| CXCL14 / BRAK                     | 1,897.33 | 2,889.69 | 0.66 |



|                   |          |          |             |
|-------------------|----------|----------|-------------|
| <b>CCL28</b>      | 3,373.33 | 5,188.51 | <b>0.65</b> |
| <b>CCR4</b>       | 3,373.33 | 5,188.51 | <b>0.65</b> |
| <b>IL-11</b>      | 3,446.67 | 5,352.98 | <b>0.64</b> |
| <b>CCR9</b>       | 1,232.33 | 2,064.30 | <b>0.60</b> |
| <b>IGFBP-1</b>    | 1,364.33 | 2,436.89 | <b>0.56</b> |
| <b>GDF-8</b>      | 3,463.67 | 6,307.97 | <b>0.55</b> |
| <b>IL-1 alpha</b> | 1,467.33 | 3,314.05 | <b>0.44</b> |

---

## Supplemental methods

### CLK-cell gene expression

#### *Flow cytometry*

Flow cytometry analyses of cultured CLK cells were performed with a BD LSRII flow cytometer and BD FACSDiva™ software as previously described.<sup>1</sup> Briefly, CLK cells were blocked with 5% rat serum and stained with a panel of conjugated antibodies, including anti-c-kit-APC, anti-Sca-1-PE, anti-CD34-PE, anti-CD31-biotin, anti-CD45-Per-CP, anti-CXCR4-PE (BD Biosciences, San Jose, CA), and anti-Flk-1-biotin (Novus Biologicals, Inc., Littleton, CO), or isotype-matched control antibodies. Anti-CD31-biotin and anti-Flk-1-biotin antibodies were resolved via secondary staining with streptavidin-APC-Cy7 and streptavidin-FITC, respectively.

#### *Immunocytochemistry*

Immunofluorescent analyses on cultured slides and tissue sections were performed as previously described.<sup>1</sup> CLK cells were cultured on slides and fixed with cold 4% paraformaldehyde, then stained with primary antibodies specific for GATA4, Nkx2.5, HIF-1 $\alpha$  (Santa Cruz Biotechnology, Inc.), mouse CD184 (CXCR4) (BD Biosciences), or with isotype-matched IgG control antibodies. Pertinent secondary antibodies were conjugated with Alexa Fluor 488 or Alexa Fluor 555. Nuclei were counterstained with DAPI (Vector Laboratories, Burlingame, CA). Sections were examined under a Leica TCS confocal microscope (Leica Microsystems Inc., Bannockburn, IL).

#### *Quantitative real-time RT-PCR*

Real time RT-PCR were performed by following standard techniques.<sup>2</sup> Briefly, total RNA was extracted using the RNA Stat-60 reagent (Tel-Test, Friendswood, TX). RNA was reverse transcribed with the Taqman Multiscribe RT kit (Applied Biosystems). Real-time PCR was performed in duplicate with cDNA from 10 ng of RNA using the Lightcycler hybridization Probes Master Mix (Roche). For each probe set, a negative control without a template was included. Relative gene expression was calculated using the Ct method with normalization to

GAPDH. The primer sequences for mouse CXCR4 were 5'-CCTCGCCTTCTTCCACTGTT-3' (forward) and 5'-CTGGGCAGAGCTTTTGAAGCTTG-3' (reverse).

#### *Western blotting*

Western blotting was performed with 30 µg of whole-cell lysate by following standard techniques.<sup>2</sup> HIF-1α and CXCR4 proteins were probed with rabbit polyclonal anti-HIF-1α (Santa Cruz Biotechnology, Inc.) and biotinylated anti-mouse CD184 (CXCR4) (BD Biosciences) antibodies. GAPDH protein was probed with an HRP-conjugated antibody (Abcam Inc., Cambridge, MA) as an internal control. The antigen-antibody complexes were visualized with enhanced chemiluminescence (Amersham plc, Buckinghamshire, UK). Band intensities were determined densitometrically with Image J software, and the relative levels of HIF-1α and CXCR4 were normalized to GAPDH levels.

#### **CLK-cell migration**

CLK-cell migration was measured with QCM™ Chemotaxis 96-Well Cell Migration Assay (Millipore, Billerica, MA), consisting of two chambers separated by a ChemoTx filter (8-µm pore size). CLK cells were gently detached from the culture dish with harvesting buffer and adjusted to a concentration of  $4 \times 10^5$  cells/mL in DMEM medium. CLK cells were then seeded into the upper chamber ( $4 \times 10^4$  cells/well) and the lower chamber was filled with recombinant human SDF-1 (125 ng/mL) (R&D Systems Inc., Minneapolis, MN). The chambers were incubated at 37°C for 4 hours under hypoxic or normoxic conditions, then the CLK cells that had migrated to the lower surface of the filter were detached with cell detachment buffer, lysed, and stained with CyQuant GR dye (Chemicon International, Inc., Temecula, CA), which fluoresces strongly when bound to cellular nucleic acids. Fluorescence was measured with SpectraMax Gemini EM Dual-Scanning Microplate Spectrofluorometer with a 480/520-nm filter set (Molecular Devices, Sunnyvale, CA).

#### **Echocardiography**

Echocardiographic measurements were performed 1, 2, and 4 weeks after MI with a Vevo 770™ high-resolution ultrasound biomicroscope (VisualSonics Inc., Toronto, Ontario, Canada) and Vevo analysis software (Vevo 2.2.3, [VisualSonics Inc.]) as described

previously.<sup>3</sup> Mice were lightly anesthetized with inhaled 2% Isoflurane, and heart rates were maintained at 400 to 500 beats per minute. M-Mode short axis images were recorded at the level of the mid-papillary muscle, and B-Mode long axis images were recorded in a plane containing the aortic and mitral valves. Left-ventricular internal diameter during systole (LVISD) and diastole (LVIDD), and left-ventricular end systolic volume (LVESV) and end diastolic volume (LVEDV) were measured and used to calculate fractional shortening ( $FS = [LVIDD - LVISD] / LVIDD$ ) and ejection fraction ( $EF = [EDV - ESV] / EDV$ ).

### **Histological assessments**

Twenty-eight days after surgically induced MI and intravenous injection of CLK cells, the vasculature was labeled by injecting 50  $\mu$ L Lectin I (Vector laboratories) into the tail vein, and mice were euthanized 10 min later. The hearts were harvested, and body weights and heart weights were measured, then cardiac tissues were fixed in 4% paraformaldehyde for 4 hours, incubated overnight in 30% sucrose, embedded in OCT compound (Sakura Finetek U.S.A., Inc., Torrance, CA), snap-frozen in liquid nitrogen, and cut into 5- $\mu$ m sections. Serial cryosections were cut beginning 1 mm below the suture used to ligate the LAD and proceeding to the apex, with three consecutive sections cut per mm to allow for quantitative pathohistological analysis at each level. To evaluate infarct area, Masson Trichrome elastic tissue staining was performed as described previously.<sup>4</sup> The infarct wall thickness and infarct size was analyzed using a computerized digital image analysis system (Image Pro, version 4.5; [MediaCybernetics, Inc., Bethesda, MD]). Infarct wall thickness was measured at three points (the two ends and the middle of the infarct area) and reported as the mean value. Infarct size was reported as the ratio of the length of fibrotic area to the length of the left-ventricular inner circumference.<sup>4</sup> Vascular density was evaluated via immunofluorescent staining with an anti-Lectin I antibody (Vector Laboratories)<sup>4</sup>; 3 sections per ischemic heart and 6 fields per section were examined, and capillaries were recognized as tubular structures positive for Lectin I. All surgical procedures and pathohistological analyses were performed by investigators blinded to treatment assignment.

**Online Table II.** Oligonucleotides and Primers Used to Create Backbone Plasmids and siRNA

|                            |                                                                                                                                                |
|----------------------------|------------------------------------------------------------------------------------------------------------------------------------------------|
| Mouse CXCR4 shRNA          | sense: 5'-CCGGCCAAAGCCTGAAATGGTGGCTCGAGCCACCATTTCAGGCTTTGGTTTTTG-3'<br>antisense: 5'-AATTCAAAAACCAAAGCCTGAAATGGTGGCTCGAGCCACCATTTCAGGCTTTGG-3' |
| human Nkx2.5 genomic DNA   | Forward primer: 5'-CTCGAGAAGCTTGATACTCCCGGATGTAGCCTCGATGT-3'<br>Reverse primer: 5'-CGACGTGCGCTCCGGACAGAGGAGGGGGACTCAGCCT-3'                    |
| mouse HIF-1 $\alpha$ siRNA | sense: 5'-GGAUACAAGCUGCCUUUUUtt-3'<br>antisense: 5'-AAAAAGGCAGCUUGUAUCCtc-3'                                                                   |

## References

1. Tang YL, Shen L, Qian K, Phillips MI. A novel two-step procedure to expand cardiac Sca-1+ cells clonally. *Biochem Biophys Res Commun.* 2007;359:877-883.
2. Qin G, Kishore R, Dolan CM, Silver M, Wecker A, Luedemann CN, Thorne T, Hanley A, Curry C, Heyd L, Dinesh D, Kearney M, Martelli F, Murayama T, Goukassian DA, Zhu Y, Losordo DW. Cell cycle regulator E2F1 modulates angiogenesis via p53-dependent transcriptional control of VEGF. *Proc Natl Acad Sci U S A.* 2006;103:11015-11020.
3. Zhu W, Shou W, Payne RM, Caldwell R, Field LJ. A mouse model for juvenile doxorubicin-induced cardiac dysfunction. *Pediatr Res.* 2008;64:488-494.
4. Qin G, Ii M, Silver M, Wecker A, Bord E, Ma H, Gavin M, Goukassian DA, Yoon YS, Papayannopoulou T, Asahara T, Kearney M, Thorne T, Curry C, Eaton L, Heyd L, Dinesh D, Kishore R, Zhu Y, Losordo DW. Functional disruption of alpha4 integrin mobilizes bone marrow-derived endothelial progenitors and augments ischemic neovascularization. *J Exp Med.* 2006;203:153-163.
